# Supplementary material for: The rise of angiosperms pushed conifers to decline during global cooling
Source: PubMed Central journal article supplement — Proc Natl Acad Sci U S A. 2020 Nov 2;117(46):28867–75. doi: 10.1073/pnas.2005571117 (PMC7682372; doi:10.1073/pnas.2005571117), 2020-11-02
Supplement: pnas.2005571117.sapp.pdf [file pnas.2005571117.sapp.pdf]

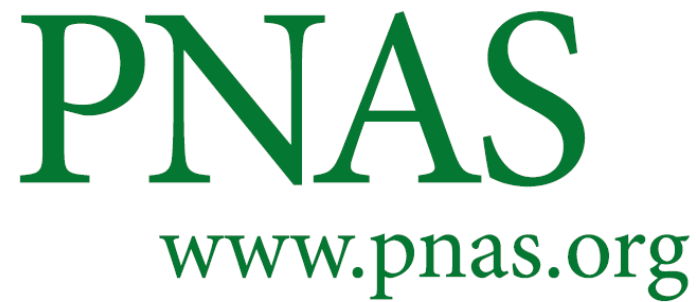

## Supplementary Information for

### **The rise of angiosperms pushed conifers to decline during global cooling**

Fabien L. Condamine, Daniele Silvestro, Eva B. Koppelhus, Alexandre Antonelli

Corresponding author: Fabien L. Condamine

Email: [fabien.condamine@gmail.com](mailto:fabien.condamine@gmail.com)

#### **This PDF file includes:**

Figs. S1 to S5

Tables S1 to S7

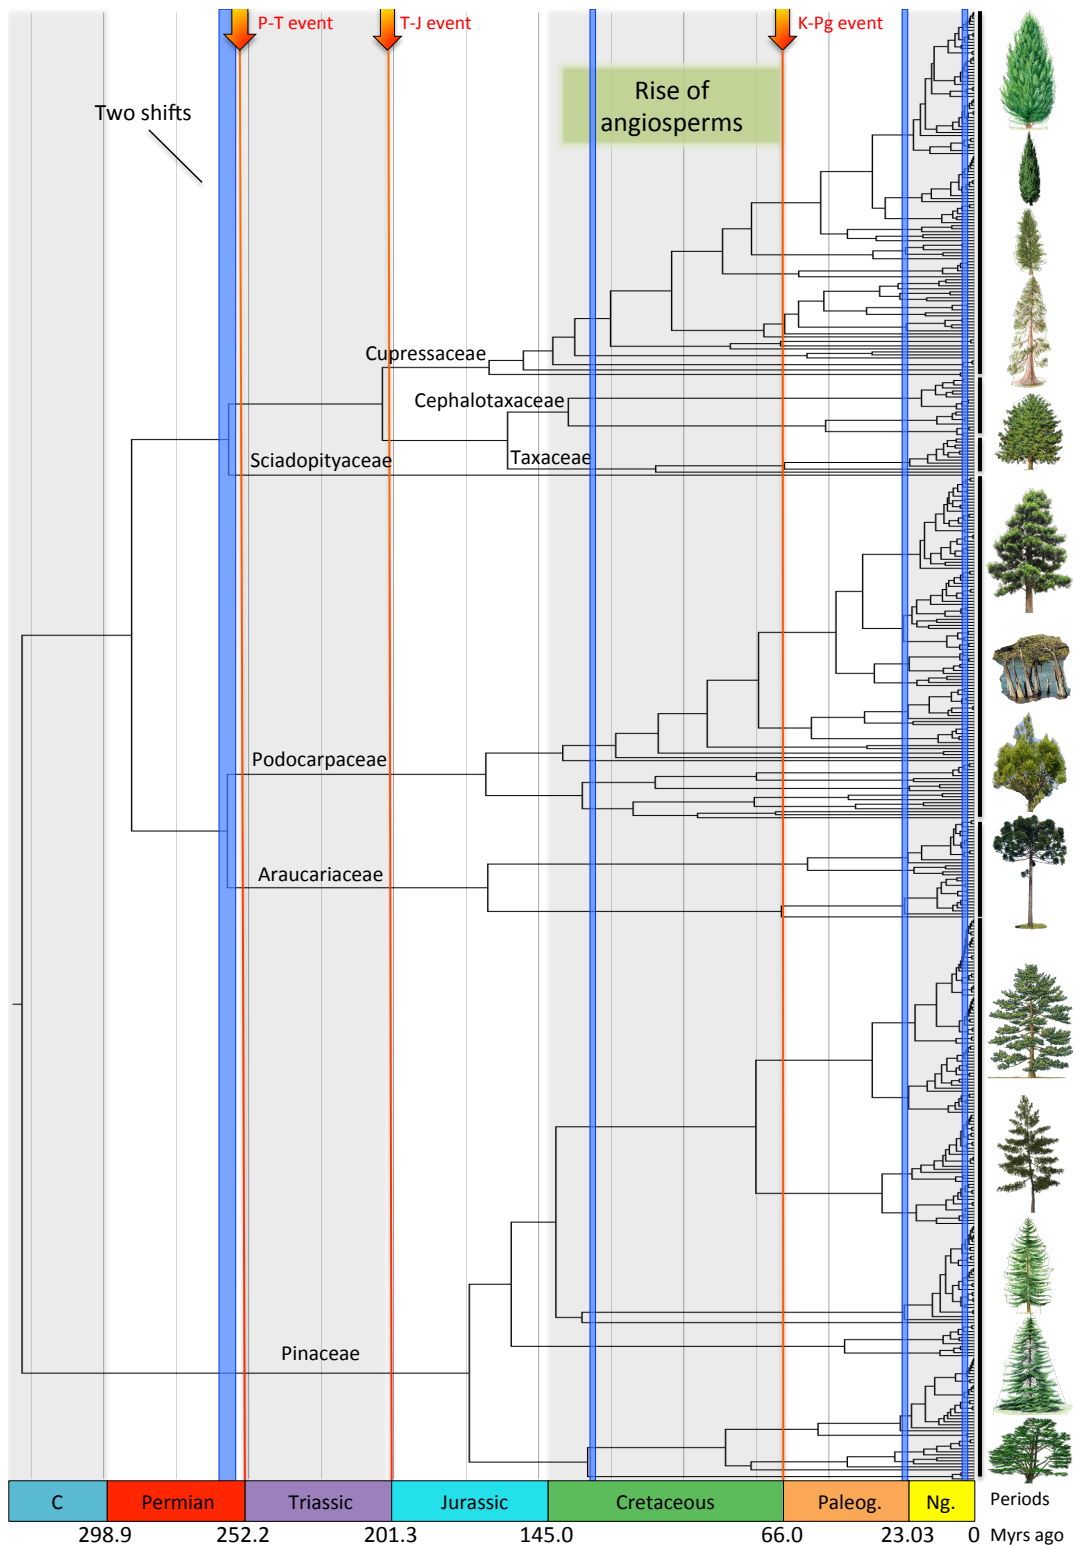

**Fig. S1.** Global diversification of conifers inferred from the phylogeny. Time-calibrated phylogeny of conifers and significant shifts in diversification rates inferred under an episodic birth-death model implemented in TreePar. Six shifts of diversification rates through time were identified, which are indicated with blue bars. Two shifts occurred at the end of the Permian, one during the Cretaceous terrestrial revolution (rise of angiosperms), one at the end of the Oligocene, and two shifts were found in the Pliocene and Pleistocene. C = Carboniferous, Paleog. = Paleogene, and Neog. = Neogene.

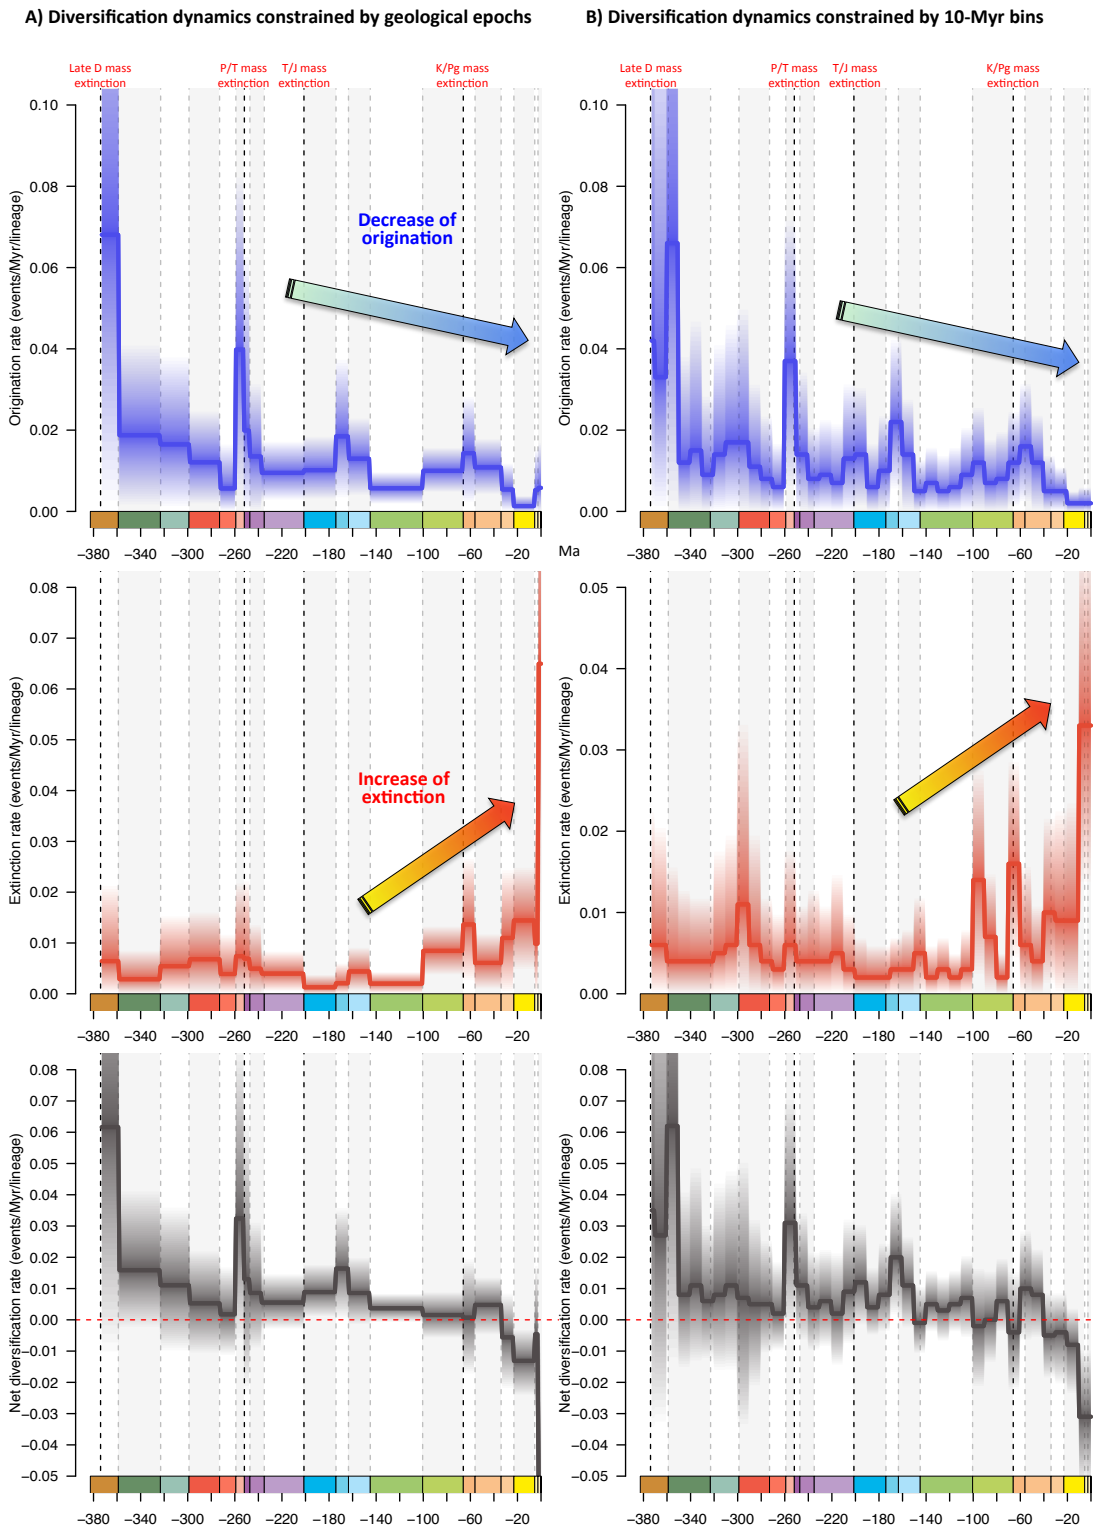

**Fig. S2.** Global diversification of conifers inferred from the fossil record. Rates of origination (blue), extinction (red) and net diversification rates (black; the difference between origination and extinction) inferred from a fossil-based analysis at the genus level under the Bayesian approach implemented in PyRate using (A) the geological epochs, or (B) 10-million-year bins for constraining the episodic birth-death model. Solid lines indicate mean posterior rates and the shaded areas show 95% credibility intervals. The vertical dashed lines indicate the boundaries between geological boundaries and major mass extinction events.

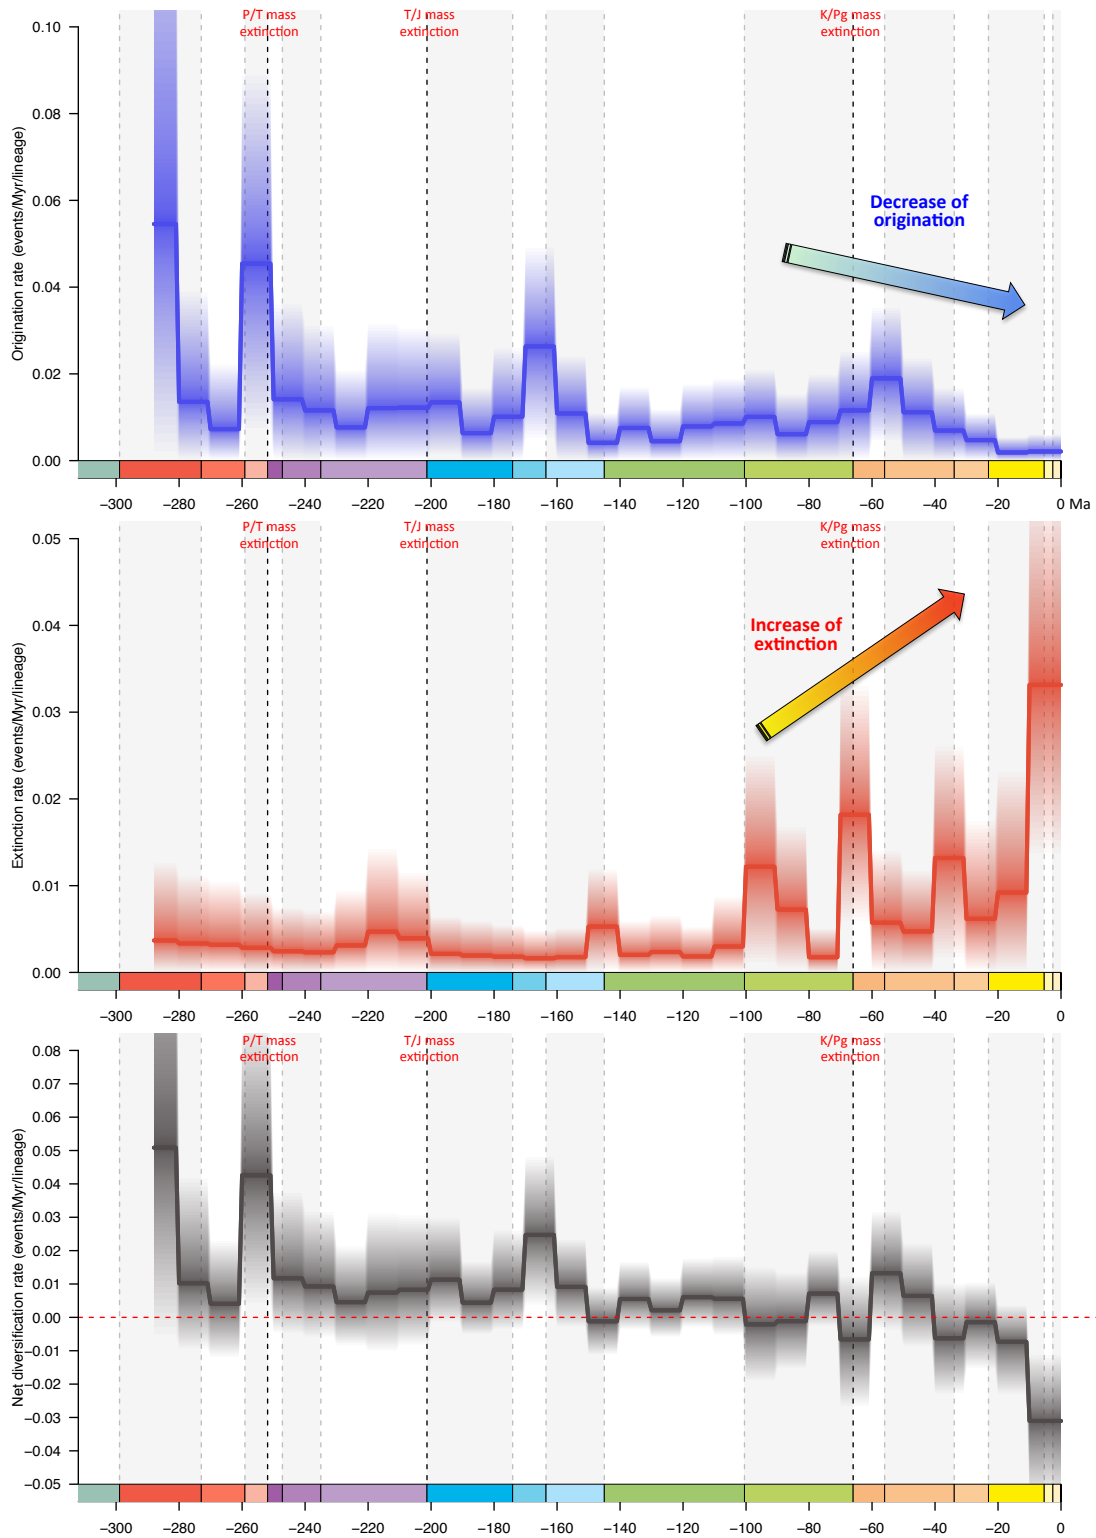

**Fig. S3.** Global diversification of conifers without the Cordaitales inferred from the fossil record. Rates of origination (blue), extinction (red) and net diversification rates (black; the difference between origination and extinction) inferred from a fossil-based analysis at the genus level under the Bayesian approach implemented in PyRate using 10-million-year bins for constraining the episodic birth-death model. Solid lines indicate mean posterior rates and the shaded areas show 95% credibility intervals. The vertical dashed lines indicate the boundaries between geological boundaries and major mass extinction events.

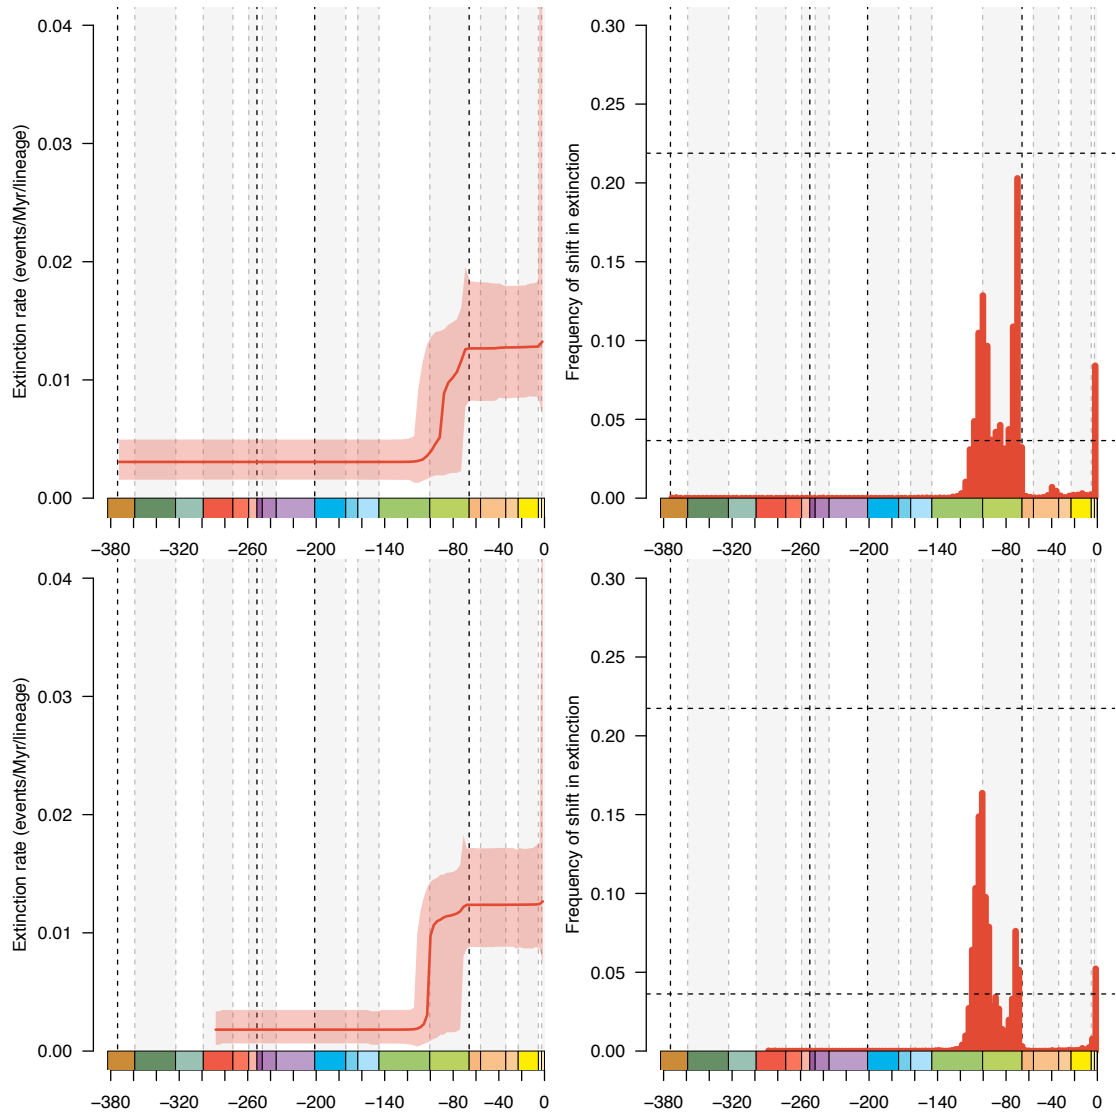

**Fig. S4.** Global extinction rate and shift times in extinction of conifers with (top panels) or without (bottom panels) the Cordaitales inferred from the fossil record. Rates of extinction were inferred from a fossil-based analysis at the genus level under the Bayesian approach implemented in PyRate using the reversible-jump model for estimating the rates of diversification as well as the shift times of diversification. Solid lines indicate mean posterior rates and the shaded areas show 95% credibility intervals. The vertical dashed lines indicate the boundaries between geological boundaries and major mass extinction events.

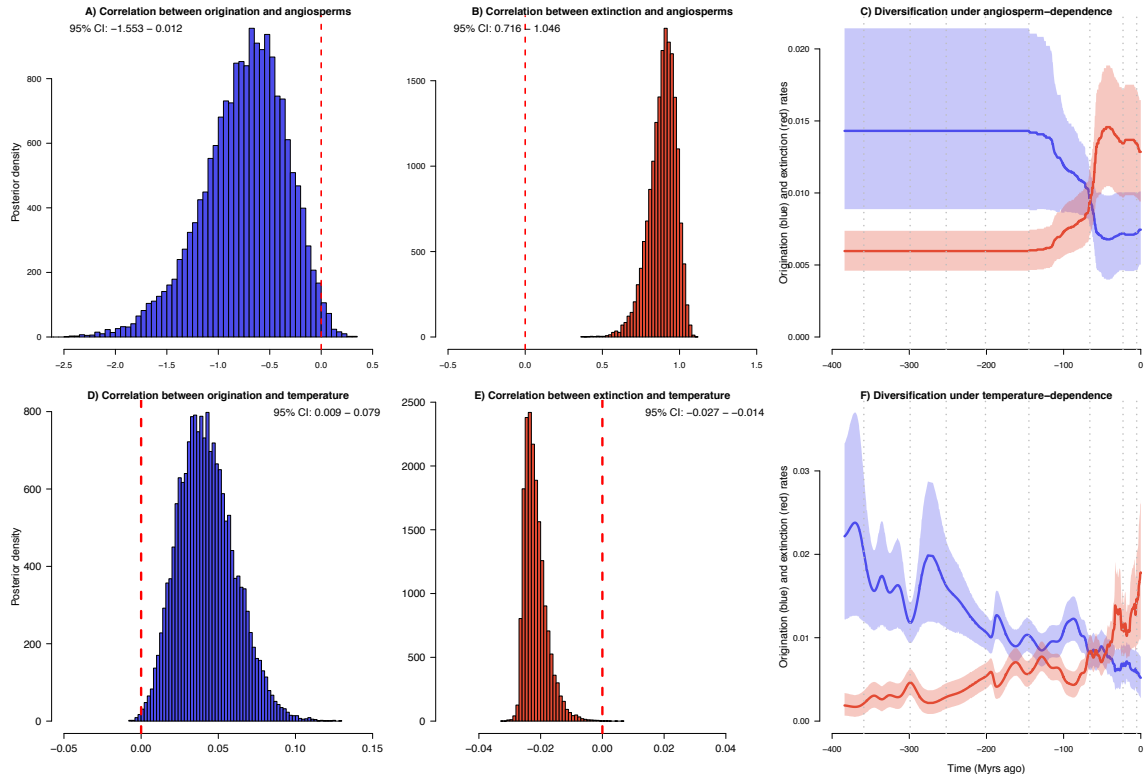

**Fig. S5.** Impact of angiosperm diversity and temperature on conifer extinction. Changes in angiosperm diversity do not correlate significantly with variations in speciation (A) but correlate positively with extinction rates (B), as shown by the posterior estimate of the correlation parameters. This leads to increase of extinction as angiosperms diversified (C). The variation of temperatures does correlate, although marginally, with speciation rate (D) and strongly correlates negatively with extinction rate (E). This leads to increase of extinction as the global climate became cooler in the Cenozoic (F). When histograms do not overlap with 0 (vertical dashed line), it denotes a significant correlation between the rate and the environmental variable, based on the 95% credibility intervals (CI).



B) Results for the conifer tree of Leslie *et al.* (2018).

| Models         | BD constant | BD with 1 shift | BD with 2 shifts | BD with 3 shifts | BD with 4 shifts | BD with 5 shifts | BD with 6 shifts | BD with 7 shifts | BD with 8 shifts |
|----------------|-------------|-----------------|------------------|------------------|------------------|------------------|------------------|------------------|------------------|
| logL           | -2151.33    | -2145.16        | <b>-2141.76</b>  | -2140.45         | -2138.85         | -2137.56         | -2135.76         | -2134.95         | -2134.05         |
| AICc           | 4306.68     | 4300.43         | <b>4299.77</b>   | 4303.37          | 4306.45          | 4310.21          | 4313.03          | 4317.89          | 4322.65          |
| $\Delta$ AICc  | 6.91        | 0.66            | <b>0.00</b>      | 3.60             | 6.68             | 10.44            | 13.26            | 18.12            | 22.88            |
| $\omega$ AIC   | 0.016       | 0.367           | <b>0.511</b>     | 0.084            | 0.018            | 0.003            | 0.001            | 0.000            | 0.000            |
| <i>P</i> (LRT) | null model  | 0.0063          | <b>0.079</b>     | 0.151            | 0.181            | 0.231            | 0.223            | 0.310            | 0.387            |
| r1             | 0.0079      | 0.0017          | <b>0.0013</b>    | 0.0013           | 0.0012           | 0.0010           | 0.0006           | 0.0006           | 0.0004           |
| $\epsilon$ 1   | 0.9502      | 0.9894          | <b>0.9895</b>    | 0.9898           | 0.9902           | 0.9918           | 0.9955           | 0.9949           | 0.9971           |
| st1            | -           | 135             | <b>1</b>         | 1                | 1                | 1                | 1                | 1                | 1                |
| r2             | -           | 0.0065          | <b>0.0019</b>    | 0.0019           | 0.0019           | 0.0019           | 0.0014           | 0.0013           | 0.0012           |
| $\epsilon$ 2   | -           | 0.9907          | <b>0.9893</b>    | 0.9892           | 0.9894           | 0.9893           | 0.9924           | 0.9927           | 0.9933           |
| st2            | -           | -               | <b>135</b>       | 128              | 124              | 37               | 37               | 24               | 24               |
| r3             | -           | -               | <b>0.0070</b>    | 0.0001           | 0.0069           | 0.0010           | 0.0008           | 0.0030           | 0.0041           |
| $\epsilon$ 3   | -           | -               | <b>0.9904</b>    | 0.9891           | 0.9892           | 0.9921           | 0.9869           | 0.9867           | 0.9805           |
| st3            | -           | -               | -                | 135              | 128              | 124              | 44               | 37               | 37               |
| r4             | -           | -               | -                | 0.0070           | 0.0001           | 0.0117           | 0.0027           | 0.0011           | 0.0011           |
| $\epsilon$ 4   | -           | -               | -                | 0.9899           | 0.9860           | 0.9784           | 0.9817           | 0.9835           | 0.9865           |
| st4            | -           | -               | -                | -                | 135              | 128              | 124              | 44               | 42               |
| r5             | -           | -               | -                | -                | 0.0059           | 0.0001           | 0.0056           | 0.0017           | 0.0001           |
| $\epsilon$ 5   | -           | -               | -                | -                | 0.9923           | 0.9866           | 0.9892           | 0.9891           | 0.9868           |
| st5            | -           | -               | -                | -                | -                | 135              | 128              | 124              | 44               |
| r6             | -           | -               | -                | -                | -                | 0.0067           | 0.0001           | 0.0179           | 0.0032           |
| $\epsilon$ 6   | -           | -               | -                | -                | -                | 0.9895           | 0.9692           | 0.9691           | 0.9780           |
| st6            | -           | -               | -                | -                | -                | -                | 135              | 128              | 124              |
| r7             | -           | -               | -                | -                | -                | -                | 0.0058           | 0.0001           | 0.0119           |
| $\epsilon$ 7   | -           | -               | -                | -                | -                | -                | 0.9909           | 0.9754           | 0.9792           |
| st7            | -           | -               | -                | -                | -                | -                | -                | 135              | 128              |
| r8             | -           | -               | -                | -                | -                | -                | -                | 0.0058           | 0.0001           |
| $\epsilon$ 8   | -           | -               | -                | -                | -                | -                | -                | 0.9914           | 0.9659           |
| st8            | -           | -               | -                | -                | -                | -                | -                | -                | 135              |
| r9             | -           | -               | -                | -                | -                | -                | -                | -                | 0.0063           |
| $\epsilon$ 9   | -           | -               | -                | -                | -                | -                | -                | -                | 0.9904           |

Nine models are compared, and the best-supported model is the one with six rate shifts, as determined by the lowest AICc,  $\Delta$ AICc and *P* (LRT). Adding more shifts of diversification did not significantly improve the likelihood of the model. Abbreviations are denoted as follows: BD, birth-death; NP, number of parameters; logL, log-likelihood; AICc, corrected Akaike Information Criterion;  $\Delta$ AICc, the difference in AICc between the model with the lowest AICc and the others; and *P* (LRT), the p-value of the likelihood ratio test. Parameter estimates are denoted as follows: r, net diversification rate (speciation minus extinction);  $\epsilon$ , turnover (extinction over speciation); st, shift time, in which ‘r1’ denotes the diversification rate and ‘ $\epsilon$ 1’ is the turnover, both inferred between Present and the shift time 1 (‘st1’).



**Table S2. Results of the time-dependent model of diversification on the conifers.**

| Models                | NP       | logL                                             | AICc                                            | $\Delta$ AICc | $\omega$ AICc | $\lambda$                                       | $\alpha$                  | $\mu$                                           | $\beta$                     |
|-----------------------|----------|--------------------------------------------------|-------------------------------------------------|---------------|---------------|-------------------------------------------------|---------------------------|-------------------------------------------------|-----------------------------|
| Bcst                  | 1        | -1994.39<br>$\pm 0.794$                          | 3990.80<br>$\pm 1.588$                          | 429.33        | 0             | 0.0527<br>$\pm 8.66E-05$                        | -                         | -                                               | -                           |
| <b>BestDcst</b>       | <b>2</b> | <b>-1778.72</b><br><b><math>\pm 1.104</math></b> | <b>3561.47</b><br><b><math>\pm 2.208</math></b> | <b>0</b>      | <b>0.336</b>  | <b>0.2090</b><br><b><math>\pm 0.0007</math></b> | -                         | <b>0.2027</b><br><b><math>\pm 0.0007</math></b> | -                           |
| BTimeVar_EXPO         | 2        | -1836.88<br>$\pm 0.956$                          | 3677.79<br>$\pm 1.912$                          | 116.32        | 0             | 0.1106<br>$\pm 0.0002$                          | -0.0235<br>$\pm 5.35E-05$ | -                                               | -                           |
| BTimeVarDcst_EXPO     | 3        | -1836.89<br>$\pm 0.956$                          | 3679.82<br>$\pm 1.912$                          | 118.35        | 0             | 0.1106<br>$\pm 0.0002$                          | -0.0235<br>$\pm 5.45E-05$ | 0 $\pm$ 0                                       | -                           |
| BcstDTimeVar_EXPO     | 3        | -1777.83<br>$\pm 1.114$                          | 3561.72<br>$\pm 2.227$                          | 0.25          | 0.296         | 0.2139<br>$\pm 0.0008$                          | -                         | 0.2129<br>$\pm 0.0009$                          | -0.0003<br>$\pm 6.10E-06$   |
| BTimeVarDTimeVar_EXPO | 4        | -1778.25<br>$\pm 1.132$                          | 3564.58<br>$\pm 2.265$                          | 3.11          | 0.071         | 0.2141<br>$\pm 0.0015$                          | -0.0030<br>$\pm 0.0004$   | 0.2136<br>$\pm 0.0018$                          | -0.0039<br>$\pm 0.0005$     |
| BTimeVar_LIN          | 2        | -1896.23<br>$\pm 0.916$                          | 3796.48<br>$\pm 1.832$                          | 235.01        | 0             | 0.0776<br>$\pm 0.0003$                          | -0.0006<br>$\pm 4.29E-06$ | -                                               | -                           |
| BTimeVarDcst_LIN      | 3        | -1837.35<br>$\pm 3.265$                          | 3680.75<br>$\pm 6.531$                          | 119.28        | 0             | 0.1323<br>$\pm 0.0044$                          | -0.0005<br>$\pm 3.47E-05$ | 0.0825<br>$\pm 0.0072$                          | -                           |
| BcstDTimeVar_LIN      | 3        | -1777.83<br>$\pm 1.113$                          | 3561.72<br>$\pm 2.226$                          | 0.25          | 0.296         | 0.2135<br>$\pm 0.0007$                          | -                         | 0.2124<br>$\pm 0.0008$                          | -5.57E-05<br>$\pm 1.36E-06$ |
| BTimeVarDTimeVar_LIN  | 4        | -1798.09<br>$\pm 2.632$                          | 3604.26<br>$\pm 5.264$                          | 42.79         | 0             | 0.1581<br>$\pm 0.0041$                          | -0.0012<br>$\pm 0.0003$   | 0.1237<br>$\pm 0.0057$                          | -0.0010<br>$\pm 0.0003$     |

Models are as follows: *Bcst* has a constant speciation (Yule model); *BcstDcst* has both constant speciation and extinction; *BTimeVar* has only speciation that varies through time; *BTimeVarDcst* has speciation that varies through time and constant extinction; *BcstDTimeVar* has constant speciation and extinction that varies through time; and *BTimeVarDTimeVar* has both speciation and extinction that vary through time. Speciation and/or extinction rates are allowed to vary exponentially (denoted by EXPO), or linearly (as indicated by LIN). Values are the means and standard errors calculated from the fit of maximum likelihood models on a random sample of 100 dated trees (obtained from the dating analysis). The delta AICc ( $\Delta$ AICc) and Akaike weight ( $\omega$ AICc) are used to compare all the models together to select the best-fit model. *The best-fit model indicates a constant birth-death model better explains the conifer phylogeny* (time-varying models did not improve significantly the likelihood). Abbreviations: NP, number of free parameters; logL, log-likelihood;  $\lambda$ , speciation rate;  $\alpha$ , rate of variation of the speciation through time;  $\mu$ , extinction rate;  $\beta$ , rate of variation of the extinction through time.

**Table S3. Results of the paleotemperature-dependent model of diversification on the conifers.**

| Models                   | NP       | logL                                             | AICc                                            | $\Delta$ AICc | $\omega$ AICc | $\lambda$                                       | $\alpha$                  | $\mu$                                           | $\beta$                                            |
|--------------------------|----------|--------------------------------------------------|-------------------------------------------------|---------------|---------------|-------------------------------------------------|---------------------------|-------------------------------------------------|----------------------------------------------------|
| BTempVar_EXPO            | 2        | -1807.44<br>$\pm 0.977$                          | 3618.89<br>$\pm 1.953$                          | 57.77         | $\approx 0$   | 0.1935<br>$\pm 0.0005$                          | -0.1466<br>$\pm 0.0003$   | -                                               | -                                                  |
| BTempVarDcst_EXPO        | 3        | -1807.44<br>$\pm 0.977$                          | 3620.93<br>$\pm 1.954$                          | 59.81         | $\approx 0$   | 0.1937<br>$\pm 0.0005$                          | -0.1467<br>$\pm 0.0003$   | 7.34E-08<br>$\pm 6.66E-09$                      | -                                                  |
| <b>BcstDTempVar_EXPO</b> | <b>3</b> | <b>-1777.54</b><br><b><math>\pm 1.127</math></b> | <b>3561.12</b><br><b><math>\pm 2.253</math></b> | <b>0</b>      | <b>0.425</b>  | <b>0.2173</b><br><b><math>\pm 0.0009</math></b> | -                         | <b>0.2222</b><br><b><math>\pm 0.0012</math></b> | <b>-0.0029</b><br><b><math>\pm 8.19E-05</math></b> |
| BTempVarDTempVar_EXPO    | 4        | -1777.57<br>$\pm 1.135$                          | 3563.22<br>$\pm 2.271$                          | 2.10          | 0.149         | 0.2143<br>$\pm 0.0013$                          | 0.0040<br>$\pm 0.0008$    | 0.2195<br>$\pm 0.0015$                          | 0.0012<br>$\pm 0.0008$                             |
| BTempVar_LIN             | 2        | -1857.48<br>$\pm 0.846$                          | 3718.98<br>$\pm 1.692$                          | 157.86        | $\approx 0$   | 0.1010<br>$\pm 0.0002$                          | -0.0043<br>$\pm 2.85E-05$ | -                                               | -                                                  |
| BTempVarDcst_LIN         | 3        | -1829.74<br>$\pm 1.637$                          | 3665.53<br>$\pm 3.274$                          | 104.41        | $\approx 0$   | 0.1322<br>$\pm 0.0023$                          | -0.0047<br>$\pm 0.0002$   | 0.0395<br>$\pm 0.0050$                          | -                                                  |
| BcstDTempVar_LIN         | 3        | -1777.54<br>$\pm 1.126$                          | 3561.12<br>$\pm 2.253$                          | 0             | 0.425         | 0.2172<br>$\pm 0.0009$                          | -                         | 0.2218<br>$\pm 0.0011$                          | -0.0006<br>$\pm 2.08E-05$                          |
| BTempVarDTempVar_LIN     | 4        | -1828.28<br>$\pm 1.342$                          | 3664.63<br>$\pm 2.685$                          | 103.51        | $\approx 0$   | 0.1553<br>$\pm 0.0018$                          | -0.0107<br>$\pm 0.0003$   | 0.0166<br>$\pm 0.0025$                          | -0.0044<br>$\pm 0.0003$                            |

Models are as follows: *BTempVar* has only speciation that varies with past temperature; *BTempVarDcst* has speciation that varies with past temperature and constant extinction; *BcstDTempVar* has constant speciation and extinction that varies with past temperature; and *BTempVarDTempVar* has both speciation and extinction that vary with past temperature. Speciation and/or extinction rates are allowed to vary exponentially (denoted by EXPO), or linearly (as indicated by LIN). Values are the means and standard errors calculated from the fit of maximum likelihood models on a random sample of 100 dated trees (obtained from the dating analysis). The delta AICc ( $\Delta$ AICc) and Akaike weight ( $\omega$ AICc) are used to compare all the models together to select the best-fit model. *The best-fit model indicates a negative exponential correlation between extinction and past temperatures, suggesting that extinction decreased during warmer climate whereas extinction increased during cooler climate* (there is no effect on speciation). Note that the second best-fit model is the same model but with linear dependency, and recovers the same result. Abbreviations: NP, number of free parameters; logL, log-likelihood;  $\lambda$ , speciation rate;  $\alpha$ , rate of variation of the speciation according to the paleo-environmental variable;  $\mu$ , extinction rate;  $\beta$ , rate of variation of the extinction according to the paleo-environmental variable.

**Table S4. Results of the atmospheric carbon-dependent model of diversification on the conifers.**

| Models                     | NP       | logL                                            | AICc                                           | $\Delta$ AICc | $\omega$ AICc | $\lambda$                                      | $\alpha$                  | $\mu$                                          | $\beta$                                          |
|----------------------------|----------|-------------------------------------------------|------------------------------------------------|---------------|---------------|------------------------------------------------|---------------------------|------------------------------------------------|--------------------------------------------------|
| BCarbonVar_EXPO            | 2        | -1876.50<br>$\pm$ 1.181                         | 3757.02<br>$\pm$ 2.361                         | 194.11        | $\approx$ 0   | 0.2531<br>$\pm$ 0.0016                         | -0.0034<br>$\pm$ 1.34E-05 | -                                              | -                                                |
| BCarbonVarDCST_EXPO        | 3        | -1778.58<br>$\pm$ 1.109                         | 3563.22<br>$\pm$ 2.218                         | 0.31          | 0.382         | 0.2094<br>$\pm$ 0.0007                         | 0.0000<br>$\pm$ 2.57E-06  | 0.2080<br>$\pm$ 0.0010                         | -                                                |
| <b>BCSTDCarbonVar_EXPO</b> | <b>3</b> | <b>-1778.43</b><br><b><math>\pm</math>1.114</b> | <b>3562.91</b><br><b><math>\pm</math>2.228</b> | <b>0</b>      | <b>0.446</b>  | <b>0.2131</b><br><b><math>\pm</math>0.0008</b> | -                         | <b>0.2152</b><br><b><math>\pm</math>0.0011</b> | <b>-0.0001</b><br><b><math>\pm</math>2.30E-0</b> |
| CarbonVarDCarbonVar_EXPO   | 4        | -1778.42<br>$\pm$ 1.207                         | 3564.93<br>$\pm$ 2.415                         | 2.02          | 0.162         | 0.2357<br>$\pm$ 0.0033                         | -0.0004<br>$\pm$ 3.43E-05 | 0.2329<br>$\pm$ 0.0039                         | -0.0004<br>$\pm$ 3.70E-0                         |
| BCarbonVar_LIN             | 2        | -1897.22<br>$\pm$ 1.094                         | 3798.46<br>$\pm$ 2.188                         | 235.55        | $\approx$ 0   | 0.1101<br>$\pm$ 0.0004                         | -0.0001<br>$\pm$ 9.08E-07 | -                                              | -                                                |
| BCarbonVarDCST_LIN         | 3        | -1803.40<br>$\pm$ 2.339                         | 3612.85<br>$\pm$ 4.679                         | 49.94         | $\approx$ 0   | 0.1930<br>$\pm$ 0.0016                         | -0.0001<br>$\pm$ 8.85E-06 | 0.1192<br>$\pm$ 0.0072                         | -                                                |
| BCSTDCarbonVar_LIN         | 3        | -1782.25<br>$\pm$ 1.409                         | 3570.55<br>$\pm$ 2.819                         | 7.65          | 0.010         | 0.1993<br>$\pm$ 0.0032                         | -                         | 0.1900<br>$\pm$ 0.0058                         | 0.0000<br>$\pm$ 3.57E-0                          |
| BCarbonVarDCarbonVar_LIN   | 4        | -1794.10<br>$\pm$ 1.725                         | 3596.29<br>$\pm$ 3.450                         | 33.38         | $\approx$ 0   | 0.1511<br>$\pm$ 0.0098                         | -0.0006<br>$\pm$ 6.12E-05 | 0.1341<br>$\pm$ 0.0097                         | 0.0006<br>$\pm$ 5.87E-0                          |

Models are as follows: *BCarbonVar* has only speciation that varies with past atmospheric carbon; *BCarbonVarDcst* has speciation that varies with past atmospheric carbon and constant extinction; *BcstDCarbonVar* has constant speciation and extinction that varies with past atmospheric carbon; and *BCarbonVarDCarbonVar* has both speciation and extinction that vary with past atmospheric carbon. Speciation and/or extinction rates are allowed to vary exponentially (denoted by EXPO), or linearly (as indicated by LIN). Values are the means and standard errors calculated from the fit of maximum likelihood models on a random sample of 100 dated trees (obtained from the dating analysis). The delta AICc ( $\Delta$ AICc) and Akaike weight ( $\omega$ AICc) are used to compare all the models together to select the best-fit model. *The best-fit model indicates a negative exponential correlation between extinction and past atmospheric carbon concentration, suggesting that extinction decreased during warmer climate whereas extinction increased during cooler climate* (there is no effect on speciation). Note that the second best-fit model is the same model but with linear dependency, and recovers the same result. Abbreviations: NP, number of free parameters; logL, log-likelihood;  $\lambda$ , speciation rate;  $\alpha$ , rate of variation of the speciation according to the paleo-environmental variable;  $\mu$ , extinction rate;  $\beta$ , rate of variation of the extinction according to the paleo-environmental variable.

**Table S5. Results of the angiosperm-dependent model of diversification on the conifers.**

| Models                    | NP       | logL                                             | AICc                                            | $\Delta$ AICc | $\omega$ AICc | $\lambda$                                       | $\alpha$                | $\mu$                                           | $\beta$                                         |
|---------------------------|----------|--------------------------------------------------|-------------------------------------------------|---------------|---------------|-------------------------------------------------|-------------------------|-------------------------------------------------|-------------------------------------------------|
| BAngioVar_EXPO            | 2        | -1923.01<br>$\pm 0.715$                          | 3850.04<br>$\pm 1.430$                          | 291.03        | $\approx 0$   | 0.0127<br>$\pm 4.23E-05$                        | 1.8557<br>$\pm 0.0036$  | -                                               | -                                               |
| BAngioVarDcst_EXPO        | 3        | -1776.54<br>$\pm 1.125$                          | 3559.13<br>$\pm 2.250$                          | 0.12          | 0.193         | 0.2305<br>$\pm 0.0009$                          | -0.0711<br>$\pm 0.0011$ | 0.2171<br>$\pm 0.0009$                          | -                                               |
| <b>BcstDAngioVar_EXPO</b> | <b>3</b> | <b>-1776.48</b><br><b><math>\pm 1.123</math></b> | <b>3559.01</b><br><b><math>\pm 2.246</math></b> | <b>0</b>      | <b>0.205</b>  | <b>0.2161</b><br><b><math>\pm 0.0007</math></b> | -                       | <b>0.2023</b><br><b><math>\pm 0.0007</math></b> | <b>0.0772</b><br><b><math>\pm 0.0012</math></b> |
| BAngioVarDAngioVar_EXPO   | 4        | -1776.32<br>$\pm 1.111$                          | 3560.73<br>$\pm 2.222$                          | 1.72          | 0.087         | 0.1801<br>$\pm 0.0048$                          | 0.2444<br>$\pm 0.0299$  | 0.1650<br>$\pm 0.0049$                          | 0.3525<br>$\pm 0.0340$                          |
| BAngioVar_LIN             | 2        | -1921.44<br>$\pm 0.770$                          | 3846.90<br>$\pm 1.540$                          | 287.89        | $\approx 0$   | 0.0097<br>$\pm 3.50E-05$                        | 0.0646<br>$\pm 0.0001$  | -                                               | -                                               |
| BAngioVarDcst_LIN         | 3        | -1776.53<br>$\pm 1.125$                          | 3559.11<br>$\pm 2.251$                          | 0.10          | 0.195         | 0.2305<br>$\pm 0.0009$                          | -0.0159<br>$\pm 0.0003$ | 0.2171<br>$\pm 0.0008$                          | -                                               |
| BcstDAngioVar_LIN         | 3        | -1776.49<br>$\pm 1.123$                          | 3559.03<br>$\pm 2.245$                          | 0.02          | 0.203         | 0.2161<br>$\pm 0.0008$                          | -                       | 0.2022<br>$\pm 0.0007$                          | 0.0162<br>$\pm 0.0003$                          |
| BAngioVarDAngioVar_LIN    | 4        | -1776.02<br>$\pm 1.122$                          | 3560.12<br>$\pm 2.244$                          | 1.11          | 0.118         | 0.1579<br>$\pm 0.0074$                          | 0.0650<br>$\pm 0.0082$  | 0.1448<br>$\pm 0.0072$                          | 0.0945<br>$\pm 0.0106$                          |

Models are as follows: *BAngioVar* has only speciation that varies with the proportion of angiosperms; *BAngioVarDcst* has speciation that varies with the proportion of angiosperms and constant extinction; *BcstDAngioVar* has constant speciation and extinction that varies with the proportion of angiosperms; and *BAngioVarDAngioVar* has both speciation and extinction that vary with the proportion of angiosperms. Speciation and/or extinction rates are allowed to vary exponentially (denoted by EXPO), or linearly (as indicated by LIN). Values are the means and standard errors calculated from the fit of maximum likelihood models on a random sample of 100 dated trees (obtained from the dating analysis). The delta AICc ( $\Delta$ AICc) and Akaike weight ( $\omega$ AICc) are used to compare all the models together to select the best-fit model. *The best-fit model indicates a positive exponential correlation between extinction and the proportion of angiosperms, suggesting that extinction increased when angiosperms diversified whereas extinction decreased during angiosperms were absent* (there is no effect on speciation). Note that the second best-fit model is the same model but with linear dependency, and recovers the same result. Abbreviations: NP, number of free parameters; logL, log-likelihood;  $\lambda$ , speciation rate;  $\alpha$ , rate of variation of the speciation according to the paleo-environmental variable;  $\mu$ , extinction rate;  $\beta$ , rate of variation of the extinction according to the paleo-environmental variable.

**Table S6. Results of all birth-death model of diversification on the conifer tree of Leslie et al. (2018).**

| Models                    | NP       | logL            | AICc           | $\Delta$ AICc | $\omega$ AICc | $\lambda$     | $\alpha$ | $\mu$         | $\beta$       |
|---------------------------|----------|-----------------|----------------|---------------|---------------|---------------|----------|---------------|---------------|
| <b>BCSTDAngioVar_LIN</b>  | <b>3</b> | <b>-2148.64</b> | <b>4303.32</b> | <b>0.00</b>   | <b>0.161</b>  | <b>0.1642</b> | -        | <b>0.1477</b> | <b>0.0175</b> |
| BCSTDAngioVar_EXPO        | 3        | -2148.64        | 4303.32        | 0.01          | 0.161         | 0.1642        | -        | 0.1477        | 0.1117        |
| BAngioVarDCST_EXPO        | 3        | -2148.85        | 4303.74        | 0.42          | 0.131         | 0.1792        | -0.0966  | 0.1636        | -             |
| BAngioVarDCST_LIN         | 3        | -2148.86        | 4303.76        | 0.44          | 0.129         | 0.1789        | -0.0164  | 0.1635        | -             |
| BAngioVarDAngioVar_EXPO   | 4        | -2148.25        | 4304.57        | 1.26          | 0.086         | 0.1168        | 0.3501   | 0.1001        | 0.4996        |
| BAngioVarDAngioVar_LIN    | 4        | -2148.25        | 4304.58        | 1.26          | 0.086         | 0.1127        | 0.0565   | 0.0935        | 0.0750        |
| BCSTDTimeVar_EXPO         | 3        | -2150.14        | 4306.32        | 3.00          | 0.036         | 0.1628        | -        | 0.1611        | -0.0005       |
| BCSTDTimeVar_LIN          | 3        | -2150.15        | 4306.34        | 3.02          | 0.036         | 0.1626        | -        | 0.1607        | -0.0001       |
| BTimeVarDTimeVar_LIN      | 4        | -2149.21        | 4306.49        | 3.17          | 0.033         | 0.1647        | -0.0005  | 0.1625        | -0.0007       |
| BCSTDcst                  | 2        | -2151.33        | 4306.68        | 3.36          | 0.030         | 0.1582        | -        | 0.1503        | -             |
| BCSTDTempVar_LIN          | 3        | -2150.60        | 4307.23        | 3.92          | 0.023         | 0.1633        | -        | 0.1639        | -0.0005       |
| BCSTDTempVar_EXPO         | 3        | -2150.60        | 4307.24        | 3.92          | 0.023         | 0.1634        | -        | 0.1642        | -0.0032       |
| BTimeVarDTimeVar_EXPO     | 4        | -2149.95        | 4307.98        | 4.66          | 0.016         | 0.1647        | -0.0029  | 0.1630        | -0.0040       |
| BCarbonVarDCST_EXPO       | 3        | -2151.08        | 4308.21        | 4.89          | 0.014         | 0.1578        | 0.0001   | 0.1578        | -             |
| BCSTDCarbonVar_EXPO       | 3        | -2151.10        | 4308.23        | 4.92          | 0.014         | 0.1612        | -        | 0.1609        | -0.0001       |
| BCSTDCarbonVar_LIN        | 3        | -2151.10        | 4308.24        | 4.92          | 0.014         | 0.1611        | -        | 0.1606        | 0.0000        |
| BTempVarDTempVar_EXPO     | 4        | -2150.62        | 4309.32        | 6.00          | 0.008         | 0.1653        | -0.0121  | 0.1625        | -0.0156       |
| BTempVarDTempVar_LIN      | 4        | -2154.74        | 4317.55        | 14.24         | 1.31E-04      | 0.1667        | -0.0052  | 0.1474        | -0.0050       |
| BCarbonVarDCarbonVar_LIN  | 4        | -2156.00        | 4320.07        | 16.76         | 3.72E-05      | 0.1979        | -0.0001  | 0.1993        | -0.0001       |
| BCarbonVarDCarbonVar_EXPO | 4        | -2160.16        | 4328.40        | 25.08         | 5.77E-07      | 0.2595        | -0.0012  | 0.2371        | -0.0012       |
| BTempVar_EXPO             | 2        | -2173.29        | 4350.60        | 47.28         | 8.72E-12      | 0.1528        | -0.1297  | -             | -             |
| BTempVarDCST_EXPO         | 3        | -2173.29        | 4352.62        | 49.30         | 3.18E-12      | 0.1527        | -0.1296  | 0.0000        | -             |
| BTempVarDCST_LIN          | 3        | -2189.98        | 4386.00        | 82.68         | 1.79E-19      | 0.1070        | -0.0045  | 0.0163        | -             |
| BCarbonVarDCST_LIN        | 3        | -2197.34        | 4400.72        | 97.40         | 1.14E-22      | 0.1470        | -0.0001  | 0.0527        | -             |
| BTimeVar_EXPO             | 2        | -2202.55        | 4409.13        | 105.81        | 1.70E-24      | 0.0918        | -0.0202  | -             | -             |
| BTempVar_LIN              | 2        | -2202.60        | 4409.21        | 105.89        | 1.64E-24      | 0.0913        | -0.0039  | -             | -             |
| BTimeVarDCST_EXPO         | 3        | -2202.55        | 4411.15        | 107.83        | 6.20E-25      | 0.0918        | -0.0202  | 0.0000        | -             |
| BTimeVarDCST_LIN          | 3        | -2211.73        | 4429.51        | 126.19        | 6.39E-29      | 0.0903        | -0.0008  | 0.0251        | -             |
| BTimeVar_LIN              | 2        | -2234.40        | 4472.81        | 169.50        | 2.53E-38      | 0.0713        | -0.0007  | -             | -             |
| BCarbonVar_EXPO           | 2        | -2244.92        | 4493.87        | 190.55        | 6.76E-43      | 0.1759        | -0.0028  | -             | -             |
| BCarbonVar_LIN            | 2        | -2255.61        | 4515.24        | 211.92        | 1.55E-47      | 0.1043        | -0.0001  | -             | -             |
| BAngioVar_LIN             | 2        | -2267.09        | 4538.19        | 234.88        | 1.61E-52      | 0.0140        | 0.0856   | -             | -             |
| BAngioVar_EXPO            | 2        | -2275.53        | 4555.08        | 251.77        | 3.45E-56      | 0.0132        | 1.6815   | -             | -             |
| BCST                      | 1        | -2339.83        | 4681.66        | 378.35        | 1.13E-83      | 0.0487        | -        | -             | -             |

Models are ranked according to the lowest AICc score and the highest Akaike weight ( $\omega$ AICc). Model names: *Bcst* has a constant speciation (Yule model); *BestDcst* has both constant speciation and extinction; *BTimeVar* has only speciation that varies through time; *BTimeVarDcst* has speciation that varies through time and constant extinction; *BestDTimeVar* has constant speciation and extinction that varies through time; and *BTimeVarDTimeVar* has both speciation and extinction that vary through time. *BTempVar* has only speciation that varies with past temperature; *BTempVarDcst* has speciation that varies with past temperature

and constant extinction; *BcstDTempVar* has constant speciation and extinction that varies with past temperature; and *BTempVarDTempVar* has both speciation and extinction that vary with past temperature. *BCarbonVar* has only speciation that varies with past atmospheric carbon; *BCarbonVarDcst* has speciation that varies with past atmospheric carbon and constant extinction; *BcstDCarbonVar* has constant speciation and extinction that varies with past atmospheric carbon; and *BCarbonVarDCarbonVar* has both speciation and extinction that vary with past atmospheric carbon. *BAngioVar* has only speciation that varies with the proportion of angiosperms; *BAngioVarDcst* has speciation that varies with the proportion of angiosperms and constant extinction; *BcstDAngioVar* has constant speciation and extinction that varies with the proportion of angiosperms; and *BAngioVarDAngioVar* has both speciation and extinction that vary with the proportion of angiosperms. Speciation and/or extinction rates are allowed to vary exponentially (denoted by EXPO), or linearly (as indicated by LIN). Values are the estimated parameter for the maximum clade credibility tree of Leslie *et al.* (2018). The delta AICc ( $\Delta\text{AICc}$ ) and Akaike weight ( $\omega\text{AICc}$ ) are used to compare all the models together to select the best-fit model. *The best-fit model indicates a positive linear correlation between extinction and the proportion of angiosperms, suggesting that extinction increased when angiosperms diversified whereas extinction decreased during angiosperms were absent* (there is no effect on speciation). Note that the second best-fit model is the same model but with linear dependency, and recovers the same result. Abbreviations: NP, number of free parameters; logL, log-likelihood;  $\lambda$ , speciation rate;  $\alpha$ , rate of variation of the speciation according to the paleo-environmental variable;  $\mu$ , extinction rate;  $\beta$ , rate of variation of the extinction according to the paleo-environmental variable.

**Table S7. Model selection for the conifer tree of Leslie *et al.* (2018) with the phylogeny-based diversification models.**

| <b>Models</b>         | <b>NP</b> | <b>logL</b>     | <b>AICc</b>    | <b><math>\Delta</math>AICc</b> | <b><math>\omega</math>AICc</b> | <b><math>\lambda</math></b> | <b><math>\alpha</math></b> | <b><math>\mu</math></b> | <b><math>\beta</math></b> |
|-----------------------|-----------|-----------------|----------------|--------------------------------|--------------------------------|-----------------------------|----------------------------|-------------------------|---------------------------|
| Bcst DTimeVar         | 3         | -2150.14        | 4306.32        | 3.00                           | 0.154                          | 0.1628                      | -                          | 0.1611                  | -0.0005                   |
| Bcst DTempVar         | 3         | -2150.60        | 4307.23        | 3.92                           | 0.098                          | 0.1633                      | -                          | 0.1639                  | -0.0005                   |
| BCarbonVar Dcst       | 3         | -2151.08        | 4308.21        | 4.89                           | 0.060                          | 0.1578                      | 0.0001                     | 0.1578                  | -                         |
| <b>Bcst DAngioVar</b> | <b>3</b>  | <b>-2148.64</b> | <b>4303.32</b> | <b>0.00</b>                    | <b>0.689</b>                   | <b>0.1642</b>               | <b>-</b>                   | <b>0.1477</b>           | <b>0.0175</b>             |

Four models are compared, and each was previously selected in reciprocal series of time-dependent models (a model with varying extinction, *BcstDTimeVar*, was the best-fit), or of temperature-dependent models (a model with varying extinction, *BcstDTempVar*, was the best-fit), or of atmospheric carbon-dependent models (a model with varying speciation, *BCarbonVarDcst*, was the best-fit), and of angiosperm-dependent models (a model with varying extinction, *BcstDAngioVar*, was the best-fit). Values are the estimated parameter for the maximum clade credibility tree of Leslie *et al.* (2018). The delta AICc ( $\Delta$ AICc) and Akaike weight ( $\omega$ AICc) allow comparing the models to select the best-fit model. The best-fit model is the model with the extinction rate positively correlated with the proportion of angiosperms, suggesting that extinction increased when angiosperms diversified whereas extinction decreased when angiosperms were absent (no effect on speciation). Abbreviations: NP, number of free parameters; logL, log-likelihood;  $\lambda$ , speciation rate;  $\alpha$ , rate of variation of the speciation according to the paleo-environmental variable;  $\mu$ , extinction rate;  $\beta$ , rate of variation of the extinction according to the paleo-environmental variable.
